# Supplementary material for: 16S rRNA gene profiling and genome reconstruction reveal community metabolic interactions and prebiotic potential of medicinal herbs used in neurodegenerative disease and as nootropics
Source: PLoS One. 2019 Mar 19;14(3):e0213869. doi: 10.1371/journal.pone.0213869 (PMC6424447; doi:10.1371/journal.pone.0213869)
Supplement: S5 Table — Taxa are displayed in descending order of herb-responsiveness along with predicted sugar utilization pathways and fold change of each taxa in herb-supplemented cultures green (increased by >5-fold), yellow (unchanged, <5-fold) and red (decreased by >5-fold). (XLSX) [file pone.0213869.s010.xlsx]

## Sheet: Table S5
# herbs	RepSeqSpecies	Level	Glucose	Galactose	Glucuronate	Galacturonate	Xylose	Arabinose	Rhamnose	Mannose	sum	Ashwagandha_FC	Bacopa_FC	Gotu Kola_FC	Bhringraj_FC	Boswellia_FC	Guducci_FC	Jatamansi_FC	Kappikacchu_FC	Shankhapushpi_FC	Shatavari_FC
10	Acidaminococcus intestini	S	0	0	0	0	0	0	0	0	0	4461.13	1411.37	7604.7	3551.28	2922.55	6364.58	1770	38552.3	2946.36	11.92
10	Sutterella massiliensis	G	0	0	0	0	0	0	0	0	0	2359.3	2567.21	858.997	2037.05	106.943	2121.65	276.037	185.887	446.182	6.64154
8	Lutispora thermophila	S	0	0	0	0	0	0	0	0	0	4774.18	173.5	2.63333	2140	54.8	207.907	205.36	497.077	2188.3	1
8	Parasutterella excrementihominis	S	0	0	0	0	0	0	0	0	0	26.9101	48.668	8.49775	21.6568	0.546021	1.46628	22.8263	19.1063	57.4931	257.618
8	Phascolarctobacterium succinatutens	S	0	0	0	0	0	0	0	0	0	72.655	35.0222	2.16374	326.372	49.7421	155.179	2.94737	50.3021	22.4421	114.63
7	Blautia hydrogenotrophica	S	0	0	0	0	0	0	0	0	0	2422.6	401.607	1	10294	15.85	78.7833	12369.2	1	10035.5	1
7	Eubacterium [Eubacterium] eligens	S	0	0	0	0	0	0	0	0	0	549.658	186.527	0.694274	281.235	0.903133	1046.61	56.2665	52.4449	20.2604	1.60079
6	Butyrivibrio crossotus	S	0	0	0	0	0	0	0	0	0	95.5532	1084.63	0.479279	265.237	0.0540541	485.617	17.1459	1.08613	72.6054	0.901351
6	Eubacterium ramulus	S	0	0	0	0	0	0	0	0	0	582.333	1986.67	50	62	1	111.617	1	1	401.4	1
6	Ruminococcus bromii	S	0	0	0	0	0	0	0	0	0	405.894	14.8674	0.296137	95.2326	2.15021	2830.92	0.0643777	1128.46	31.5876	3.91899
5	Christensenella timonensis	S	0	0	0	0	0	0	0	0	0	179.1	412.033	1	78.28	1	868.5	100.4	1	1	1
4	Pseudomonas monteilii	S	0	0	0	0	0	0	0	0	0	107.23	1	44.2667	1	1	155.583	1	1	336.8	1
4	Ruminococcus albus	S	0	0	0	0	0	0	0	0	0	109.667	1315.67	1	1	1	1	1982	1	241.4	1
3	Sutterella wadsworthensis	S	0	0	0	0	0	0	0	0	0	5.19839	7.65346	1.48293	3.05175	5.70728	0.527755	3.68704	1.27788	4.34632	0.000409171
2	Acinetobacter radioresistens	S	0	0	0	0	0	0	0	0	0	1	1	1	3322.2	6.125	1	1	1	1	3.45
2	Ruminococcus callidus	S	0	0	0	0	0	0	0	0	0	240.333	1	1	808.2	1	1	1	1	1	1
1	Dialister pneumosintes	G	0	0	0	0	0	0	0	0	0	1	1	1	1	1	1	1	54.3333	1	1
1	Finegoldia magna	S	0	0	0	0	0	0	0	0	0	0.227273	0.227273	5.06818	0.227273	0.227273	0.882576	0.227273	250.152	0.227273	0.227273
1	Ruminiclostridium [Clostridium] methylpentosum	S	0	0	0	0	0	0	0	0	0	1.15329	7.98318	0.000993476	3.33808	0.909776	1.17336	2.5731	0.000993476	0.000993476	0.000993476
1	Veillonella dispar	S	0	0	0	0	0	0	0	0	0	1.98	1	1	1	4.775	1	1	1	1	25604.3
1	Veillonella tobetsuensis	G	0	0.36	0	0	0	0	0	0	0.36	1	1	1	1	1	1	1	1	1	5092.25
6	Ruminiclostridium [Clostridium] straminisolvens	G	0	0.14	0	0	0	0.33	0	0	0.47	8.43792	21.535	0.0677201	15.9549	1.29515	255.982	29.8375	1.42438	73.991	0.0677201
5	Ruminiclostridium thermocellum	G	0	0.14	0	0	0	0.33	0	0	0.47	789.5	1211.53	1	560.34	1	1082.93	251.16	1	1	4.3
3	Ruminiclostridium [Clostridium] cellobioparum	G	0	0.14	0	0	0	0.33	0	0	0.47	23.1667	511.333	1	1	1	6.91667	1	1	1	1
2	Ruminiclostridium [Clostridium] cellulolyticum	G	0	0.14	0	0	0	0.33	0	0	0.47	1	1	1	9.94	1	21.6667	1	1	1	2.52
3	Eubacterium [Eubacterium] combesii	G	0.33	0.39	0.06	0	0	0	0	0.17	0.95	1	1	1	1	1	238.583	1	782.483	328.8	1
2	Eubacterium ruminantium	G	0.33	0.39	0.06	0	0	0	0	0.17	0.95	660.667	1	1	10422.2	1	1	1	1	1	1
2	Eubacterium xylanophilum	G	0.33	0.39	0.06	0	0	0	0	0.17	0.95	1	1	1	95.2	1	16.05	1	1	1	1
5	Cloacibacillus evryensis	F	0.33	0	0.33	0.33	0	0	0	0	0.99	4.33834	7.36282	206.737	1.25837	1.7617	0.0847213	17.319	372.088	2.08966	72.9153
0	Alistipes putredinis	S	0	0	0	0	0	0	0	0	0	0.0200267	0.0200267	0.0200267	3.77704	0.198264	0.0471963	0.0200267	0.0200267	0.0200267	0.0200267
0	Desulfovibrio desulfuricans	S	0	0	0	0	0	0	0	0	0	0.14021	0.0171354	0.232289	0.028709	0.0449499	0.0238567	0.229549	0.193625	0.0415545	1.65638
0	Desulfovibrio piger	S	0	0	0	0	0	0	0	0	0	0.448092	0.874411	0.091565	3.25367	0.763953	0.386778	1.62998	1.97028	0.723277	0.194827
0	Desulfovibrio simplex	G	0	0	0	0	0	0	0	0	0	0.0223358	0.0425264	0.118183	0.157188	0.763756	0.00619389	0.754091	0.00362036	0.128139	0.0601686
0	Eggerthella lenta	S	0	0	0	0	0	0	0	0	0	0.00804234	0.0548418	0.141199	0.033437	0.000112325	0.0344117	0.0631493	0.00430611	0.185794	0.000690065
0	Emergencia timonensis	S	0	0	0	0	0	0	0	0	0	0.951727	1.09833	0.160905	0.570031	0.000280323	1.43796	0.443078	0.000756871	0.740231	0.00120539
0	Flavonifractor plautii	S	0	0	0	0	0	0	0	0	0	0.0160258	0.0525981	0.000210589	0.0840545	0.000210589	0.0103196	0.0154572	0.737616	0.25894	0.000210589	0.106565	0.000437968
0	Ihubacter massiliensis	F	0	0	0	0	0	0	0	0	0	0.0160258	0.0525981	0.000210589	0.0840545	0.000210589	0.0103196	0.0154572	0.737616	0.25894	0.000210589
0	Phascolarctobacterium faecium	G	0	0	0	0	0	0	0	0	0	0.24789	0.0930141	0.00605194	0.218648	0.44172	0.263338	0.1233	0.121369	0.192659	0.556905
0	Phocea massiliensis	S	0	0	0	0	0	0	0	0	0	1.33169	0.13263	0.00702988	0.00702988	0.00702988	0.227417	2.2594	0.00702988	4.77329	0.00702988
